# Supplementary material for: Complexation of drug amifampridine with Cu(ii), Zn(ii) and Cd(ii) ions, and its dimerization with the magic of Mn(ii) salts. Potential anti-COVID-19 and anticancer activities
Source: Royal Society of Chemistry journal article supplement (doi:10.1039/d3dt03281g), 2023-12-15
Supplement: d3dt03281g1.pdf [file d3dt03281g1.pdf]

*Supporting Information for:*

***Complexation of drug amifampridine with Cu(II), Zn(II) and Cd(II) ions, and its dimerization with the magic of Mn(II) salts. Potential anti-COVID-19 and anticancer activities***

Farshid Hajibabaei<sup>a</sup>, Samaneh Sanei Movafagh<sup>a</sup>, Sadegh Salehzadeh<sup>a\*</sup>, Robert William Gable<sup>b</sup>

<sup>a</sup> Faculty of Chemistry and Petroleum Sciences, Bu-Ali Sina University, Hamedan, Iran

<sup>b</sup> School of Chemistry, University of Melbourne, Victoria 3010, Australia

\*Corresponding authors. E-mail addresses: [saleh@basu.ac.ir](mailto:saleh@basu.ac.ir) (S. Salehzadeh)

**CONTENTS:**

|                                                                                                                                                                                                                                                                   |   |
|-------------------------------------------------------------------------------------------------------------------------------------------------------------------------------------------------------------------------------------------------------------------|---|
| <b>Figure S1.</b> Mass spectrum of [AmpDimer]Cl ( <b>3</b> ).....                                                                                                                                                                                                 | 4 |
| <b>Figure S2.</b> ORTEP diagram of [Zn(AMP) <sub>2</sub> Cl <sub>2</sub> ] ( <b>1</b> ) showing the hydrogen bonds (Zn: dark blue; Cl: green; N: blue; C: grey). Ellipsoids are drawn at the 50% level. Only H-atoms (open circles) on donor atoms are shown..... | 5 |
| <b>Figure S3.</b> ORTEP diagram of [AmpDimer]Cl ( <b>3</b> ) showing the hydrogen bonds (Cl: green; N: blue; C: grey). Ellipsoids are drawn at the 50% level. Only H-atoms (open circles) on donor atoms are shown.....                                           | 6 |
| <b>Figure S4.</b> ORTEP diagram of [AmpDimer]NO <sub>3</sub> ( <b>4</b> ) showing the hydrogen bonds (O: Red; N: blue; C: grey). Ellipsoids are drawn at the 25% level. Only H-atoms (open circles) on donor atoms are shown.....                                 | 7 |

|                                                                                                                                                                                                                                                                                                                                                                 |    |
|-----------------------------------------------------------------------------------------------------------------------------------------------------------------------------------------------------------------------------------------------------------------------------------------------------------------------------------------------------------------|----|
| <b>Figure S5.</b> ORTEP diagram of [AmpDimer]ClO <sub>4</sub> ( <b>5</b> ) showing the hydrogen bonds (Cl: green; O: Red; N: blue; C: grey). Ellipsoids are drawn at the 50% level. Only H-atoms (open circles) on donor atoms are shown.....                                                                                                                   | 8  |
| <b>Figure S6.</b> ORTEP diagram of [Cd(AmpDimer)Cl <sub>3</sub> ] ( <b>7</b> ) showing the hydrogen bonds (Cd: Dark blue; Cl: green; N: blue; C: grey). Ellipsoids are drawn at the 50% level. Only H-atoms (open circles) on donor atoms are shown.....                                                                                                        | 9  |
| <b>Figure S7.</b> ORTEP diagram of [Cu(tren)(AMP)](ClO <sub>4</sub> ) <sub>2</sub> ( <b>8</b> ) showing the hydrogen bonds (Cu: Dark blue; Cl: green; O: red; N: blue; C: grey). Ellipsoids are drawn at the 10% level. Only H-atoms (open circles) on donor atoms are shown. [Cd(tren)(AMP)](ClO <sub>4</sub> ) <sub>2</sub> ( <b>10</b> ) is isomorphous..... | 10 |
| <b>Figure S8.</b> <sup>1</sup> H NMR spectrum of [Zn(AMP) <sub>2</sub> Cl <sub>2</sub> ] ( <b>1</b> ) in DMSO- <i>d</i> <sub>6</sub> .....                                                                                                                                                                                                                      | 11 |
| <b>Figure S9.</b> <sup>1</sup> H NMR spectrum of [Cd <sub>2</sub> (AMP) <sub>2</sub> (μ-Cl) <sub>2</sub> Cl <sub>2</sub> ] ( <b>2</b> ) in DMSO- <i>d</i> <sub>6</sub> .....                                                                                                                                                                                    | 12 |
| <b>Figure S10.</b> <sup>1</sup> H NMR spectrum of [AmpDimer]Cl ( <b>3</b> ) in DMSO- <i>d</i> <sub>6</sub> .....                                                                                                                                                                                                                                                | 13 |
| <b>Figure S11.</b> <sup>1</sup> H NMR spectrum of [Zn(AmpDimer)Cl <sub>3</sub> ] ( <b>6</b> ) in DMSO- <i>d</i> <sub>6</sub> .....                                                                                                                                                                                                                              | 14 |
| <b>Figure S12.</b> <sup>1</sup> H NMR spectrum of [Cd(AmpDimer)Cl <sub>3</sub> ] ( <b>7</b> ) in DMSO- <i>d</i> <sub>6</sub> .....                                                                                                                                                                                                                              | 15 |
| <b>Figure S13. Figure S13.</b> Molecular docking 3D visualization of AMP (a), [AmpDimer] <sup>+</sup> cation (b), [Zn(AMP) <sub>2</sub> Cl <sub>2</sub> ] (c) and 5-FU (d) in the interaction with DNA (PDB ID: 1BNA), which shows the bond lengths between atoms of above compounds and 1BNA nucleotides.....                                                  | 16 |
| <b>Figure S14.</b> Comparison of binding affinity (kcal/mol) of AMP, [AmpDimer] <sup>+</sup> cation, [Zn(AMP) <sub>2</sub> Cl <sub>2</sub> ], [Cu(tren)(AMP)] <sup>2+</sup> cation, FAV, HCQ and RDV in the interaction with essential proteins of SARS-CoV-2.....                                                                                              | 17 |
| <b>Figure S15.</b> FT-IR (KBr) spectrum of AMP.....                                                                                                                                                                                                                                                                                                             | 18 |
| <b>Figure S16.</b> FT-IR (KBr) spectrum of [AmpDimer]Cl ( <b>3</b> ).....                                                                                                                                                                                                                                                                                       | 18 |
| <b>Figure S17.</b> FT-IR (KBr) spectrum of [AmpDimer]NO <sub>3</sub> ( <b>4</b> ).....                                                                                                                                                                                                                                                                          | 19 |

|                                                                                                                                                                                      |    |
|--------------------------------------------------------------------------------------------------------------------------------------------------------------------------------------|----|
| <b>Figure S18.</b> FT-IR (KBr) spectrum of [AmpDimer]ClO <sub>4</sub> ( <b>5</b> ).....                                                                                              | 19 |
| <b>Table S1.</b> Hydrogen Bonds for [Zn(AMP) <sub>2</sub> Cl <sub>2</sub> ] ( <b>1</b> ).....                                                                                        | 20 |
| <b>Table S2.</b> Hydrogen Bonds for [AmpDimer]Cl ( <b>3</b> ).....                                                                                                                   | 20 |
| <b>Table S3.</b> Hydrogen Bonds for [AmpDimer]NO <sub>3</sub> ( <b>4</b> ).....                                                                                                      | 21 |
| <b>Table S4.</b> Hydrogen Bonds for for [AmpDimer]ClO <sub>4</sub> ( <b>5</b> ).....                                                                                                 | 21 |
| <b>Table S5.</b> Hydrogen Bonds for [Cd(AmpDimer)Cl <sub>3</sub> ] ( <b>7</b> ).....                                                                                                 | 22 |
| <b>Table S6.</b> Selected Torsion Angles (°) for [Cu(tren)(AMP)](ClO <sub>4</sub> ) <sub>2</sub> ( <b>8</b> ) and [Cd(tren)(AMP)](ClO <sub>4</sub> ) <sub>2</sub> ( <b>10</b> )..... | 22 |
| <b>Table S7.</b> Hydrogen Bonds for [Cu(tren)(AMP)](ClO <sub>4</sub> ) <sub>2</sub> ( <b>8</b> ).....                                                                                | 23 |
| <b>Table S8.</b> Selected Bond Lengths (Å), Angles and Torsion Angles (°) for [Cd(tren)(AMP)](ClO <sub>4</sub> ) <sub>2</sub> ( <b>10</b> ).....                                     | 24 |
| <b>Table S9.</b> Hydrogen Bonds for [Cd(tren)(AMP)](ClO <sub>4</sub> ) <sub>2</sub> ( <b>10</b> ).....                                                                               | 25 |

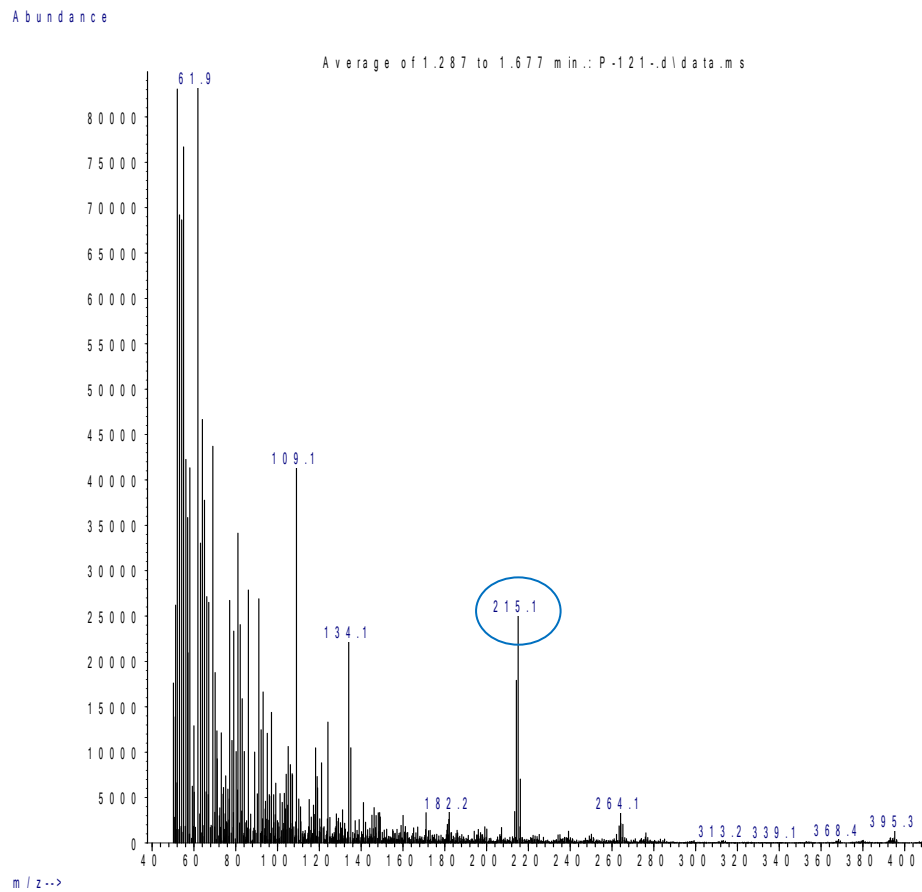

**Figure S1.** Mass spectrum of [AmpDimer]Cl (**3**).

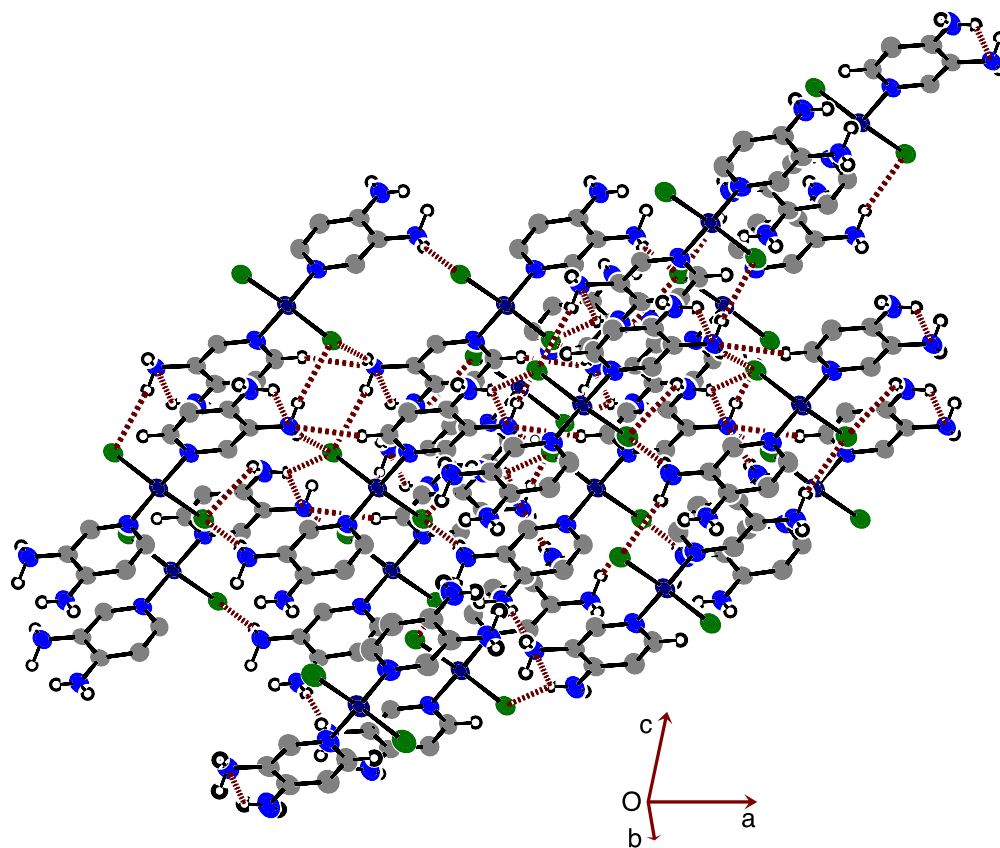

**Figure S2.** ORTEP diagram of [Zn(AMP)<sub>2</sub>Cl<sub>2</sub>] (1) showing the hydrogen bonds (Zn: dark blue; Cl: green; N: blue; C: grey). Ellipsoids are drawn at the 50% level. Only H-atoms (open circles) on donor atoms are shown.

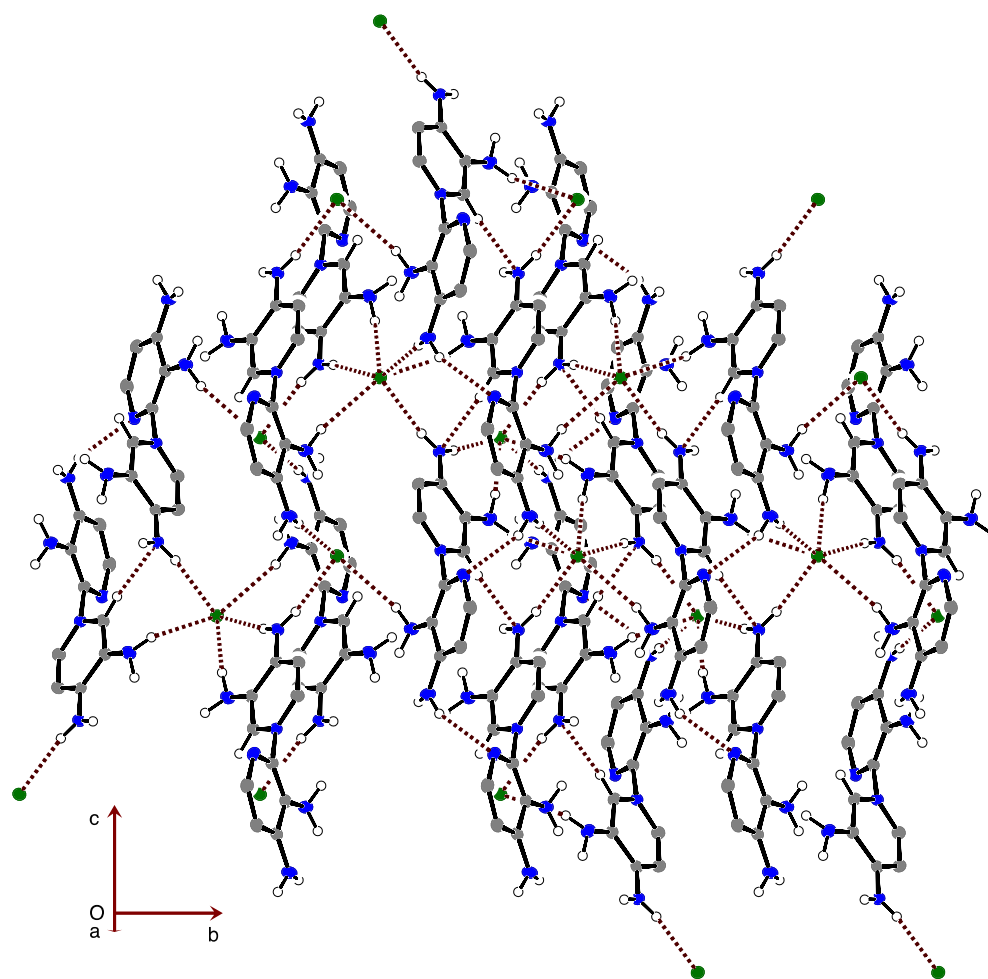

**Figure S3.** ORTEP diagram of [AmpDimer]Cl (**3**) showing the hydrogen bonds (Cl: green; N: blue; C: grey). Ellipsoids are drawn at the 50% level. Only H-atoms (open circles) on donor atoms are shown.

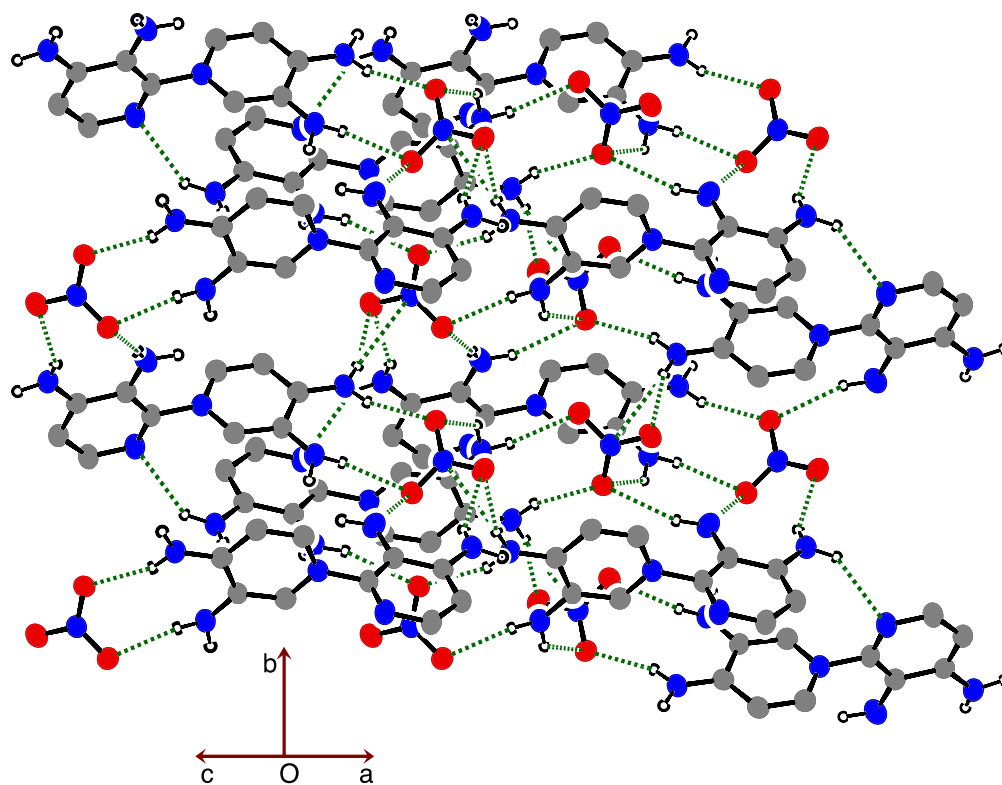

**Figure S4.** ORTEP diagram of [AmpDimer]NO<sub>3</sub> (**4**) showing the hydrogen bonds (O: Red; N: blue; C: grey). Ellipsoids are drawn at the 25% level. Only H-atoms (open circles) on donor atoms are shown.

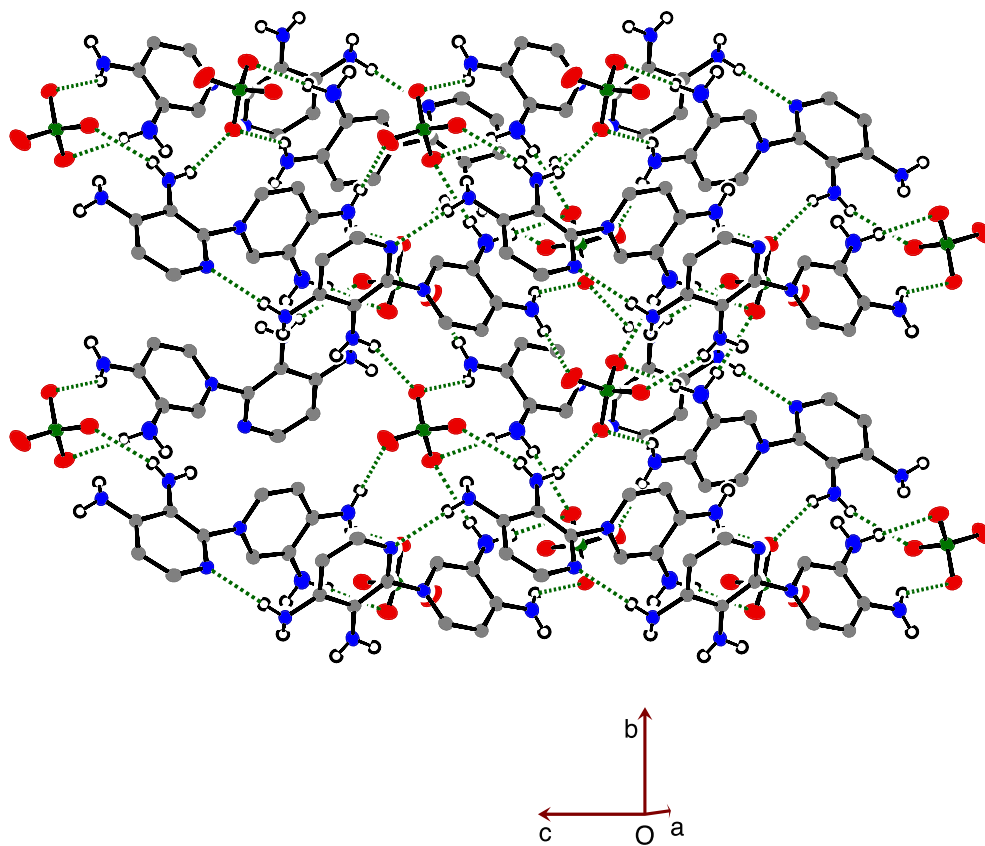

**Figure S5.** ORTEP diagram of [AmpDimer]ClO<sub>4</sub> (**5**) showing the hydrogen bonds (Cl: green; O: Red; N: blue; C: grey). Ellipsoids are drawn at the 50% level. Only H-atoms (open circles) on donor atoms are shown.



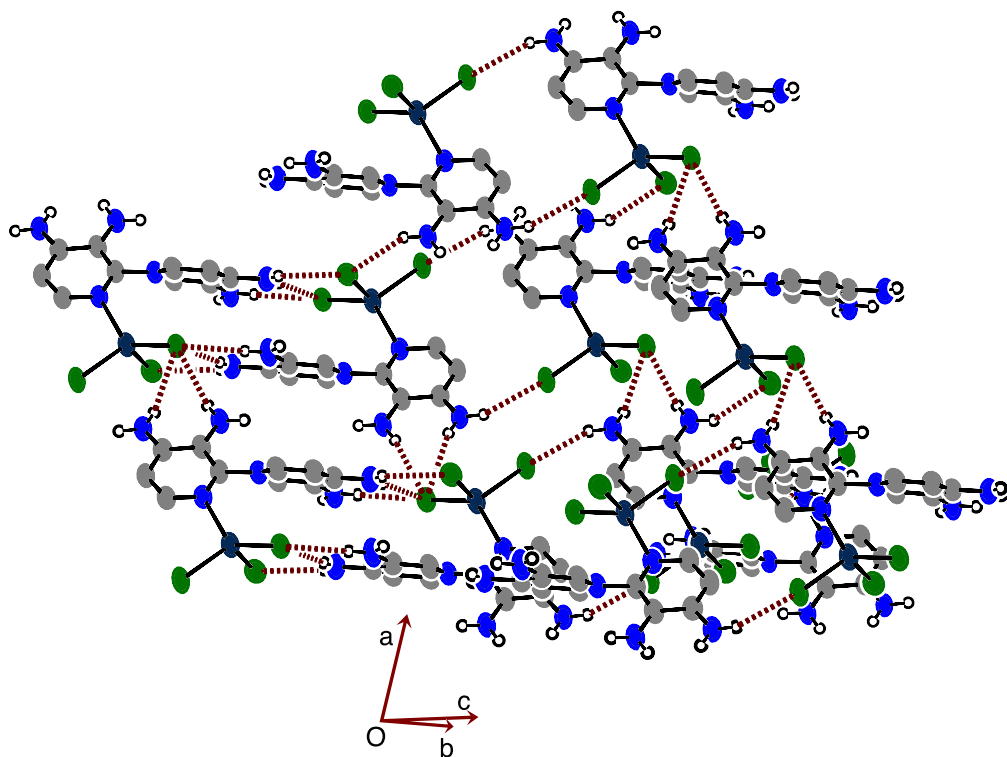

**Figure S6.** ORTEP diagram of  $[\text{Cd}(\text{AmpDimer})\text{Cl}_3]$  (**7**) showing the hydrogen bonds (Cd: Dark blue; Cl: green; N: blue; C: grey). Ellipsoids are drawn at the 50% level. Only H-atoms (open circles) on donor atoms are shown.

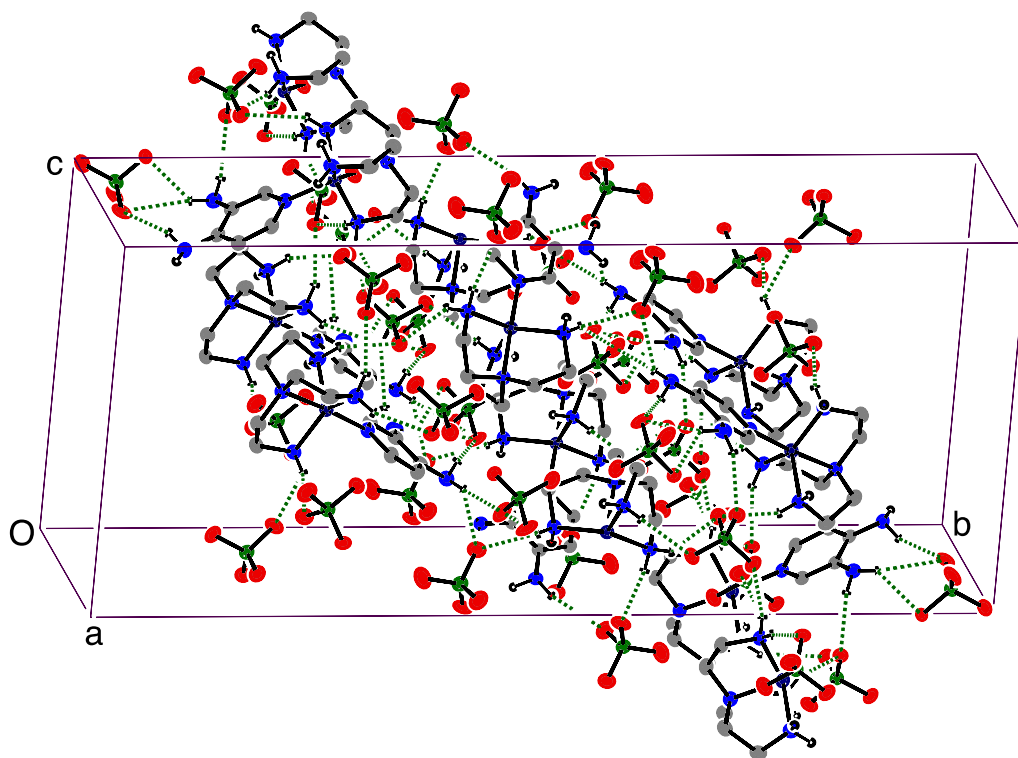

**Figure S7.** ORTEP diagram of  $[\text{Cu}(\text{tren})(\text{AMP})](\text{ClO}_4)_2$  (**8**) showing the hydrogen bonds (Cu: Dark blue; Cl: green; O: red; N: blue; C: grey). Ellipsoids are drawn at the 10% level. Only H-atoms (open circles) on donor atoms are shown.  $[\text{Cd}(\text{tren})(\text{AMP})](\text{ClO}_4)_2$  (**10**) is isomorphous.

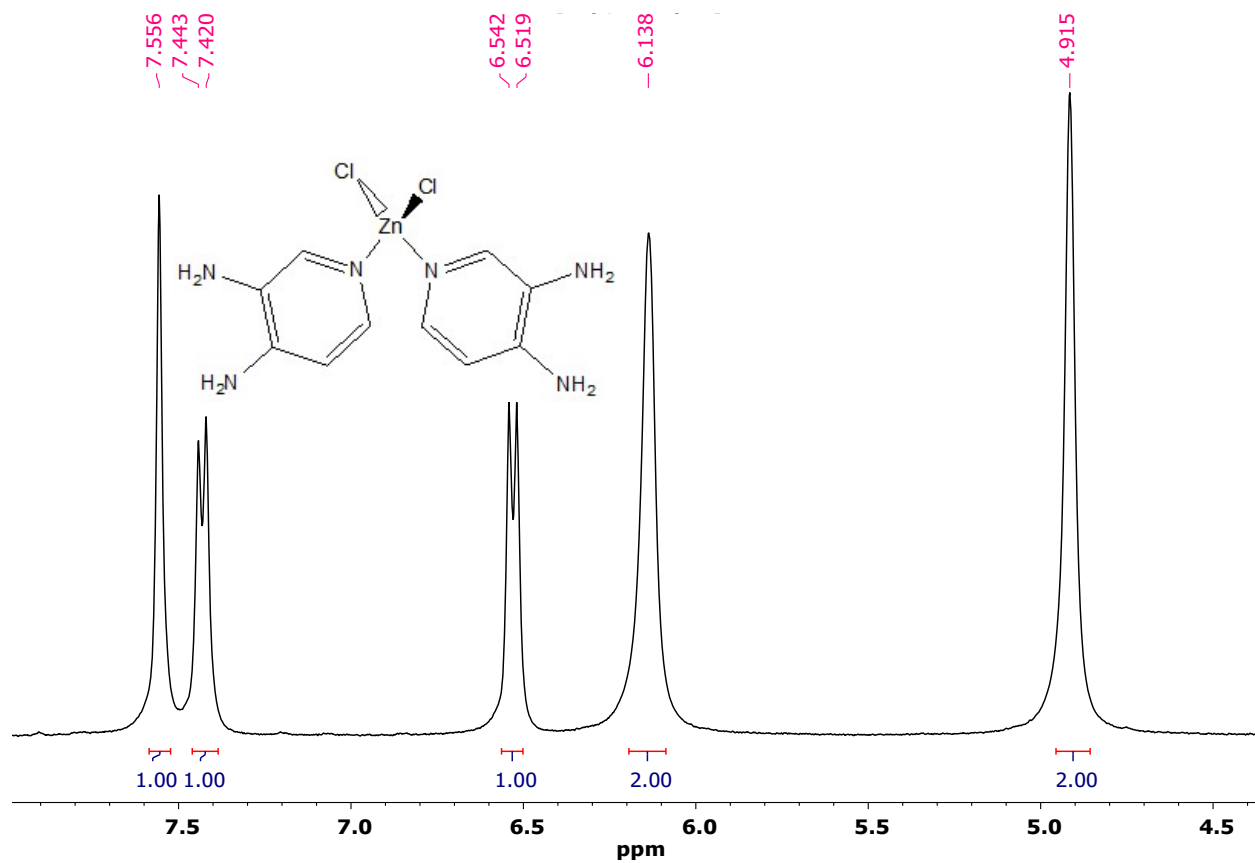

Figure S8.  $^1\text{H}$  NMR spectrum of  $[\text{Zn}(\text{AMP})_2\text{Cl}_2]$  (1) in  $\text{DMSO-}d_6$ .

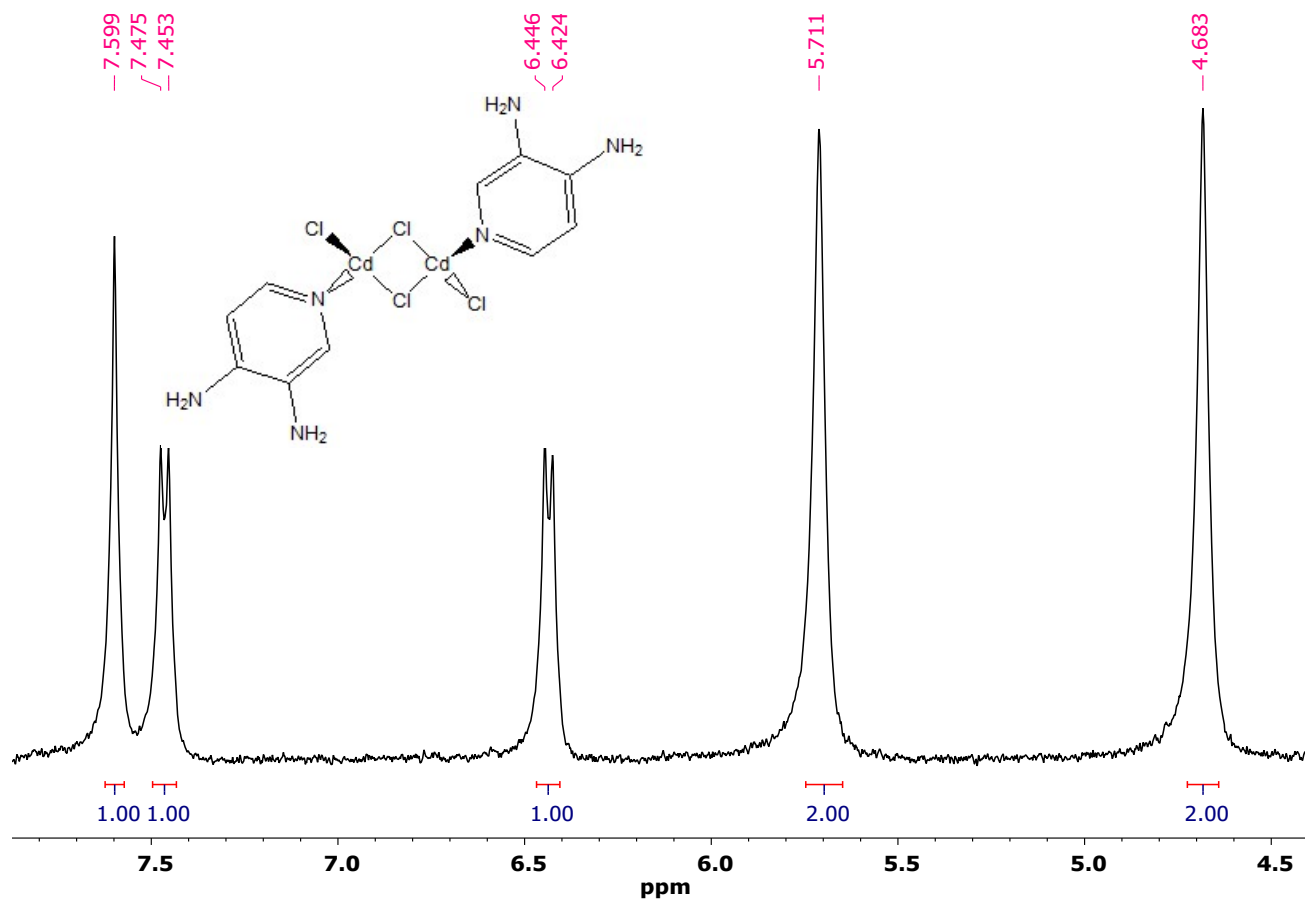

**Figure S9.** <sup>1</sup>H NMR spectrum of [Cd<sub>2</sub>(AMP)<sub>2</sub>(μ-Cl)<sub>2</sub>Cl<sub>2</sub>] (**2**) in DMSO-*d*<sub>6</sub>.

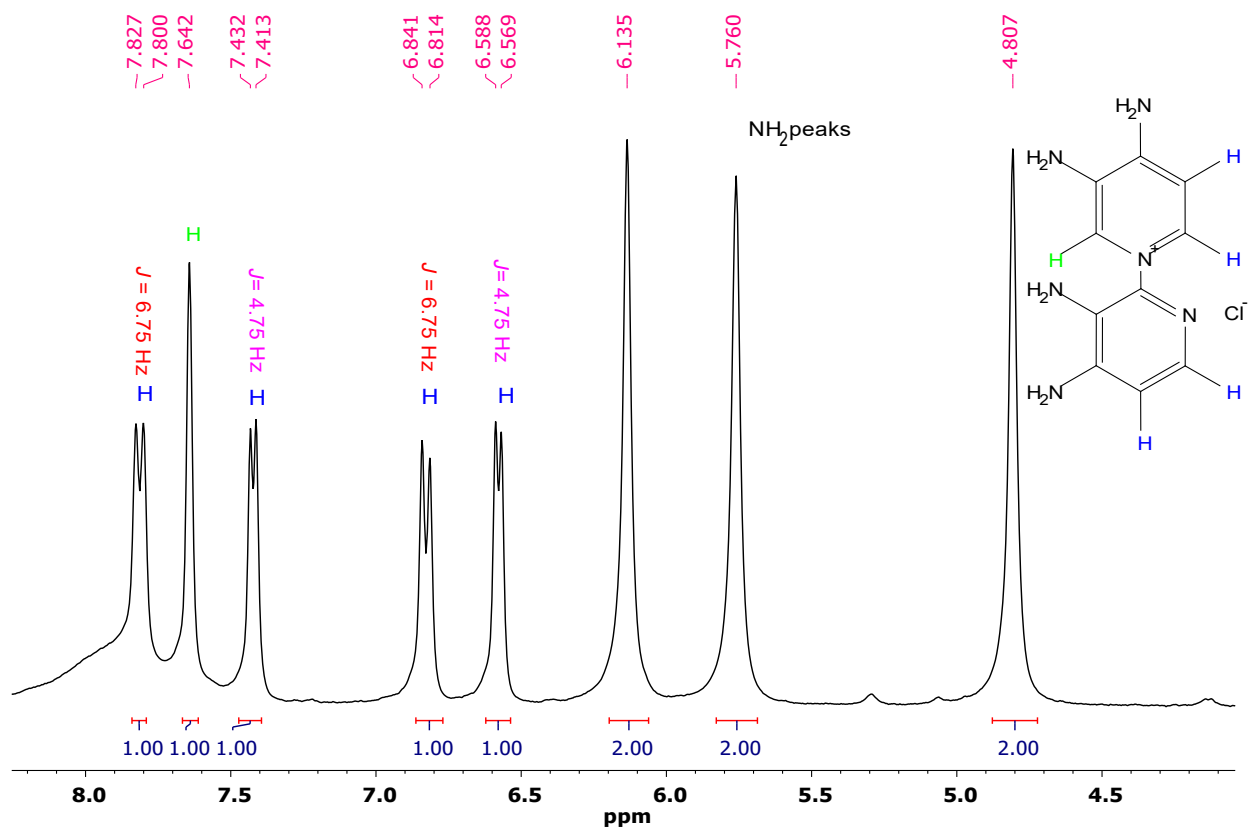

Figure S10.  $^1\text{H}$  NMR spectrum of [AmpDimer]Cl (3) in  $\text{DMSO-}d_6$ .

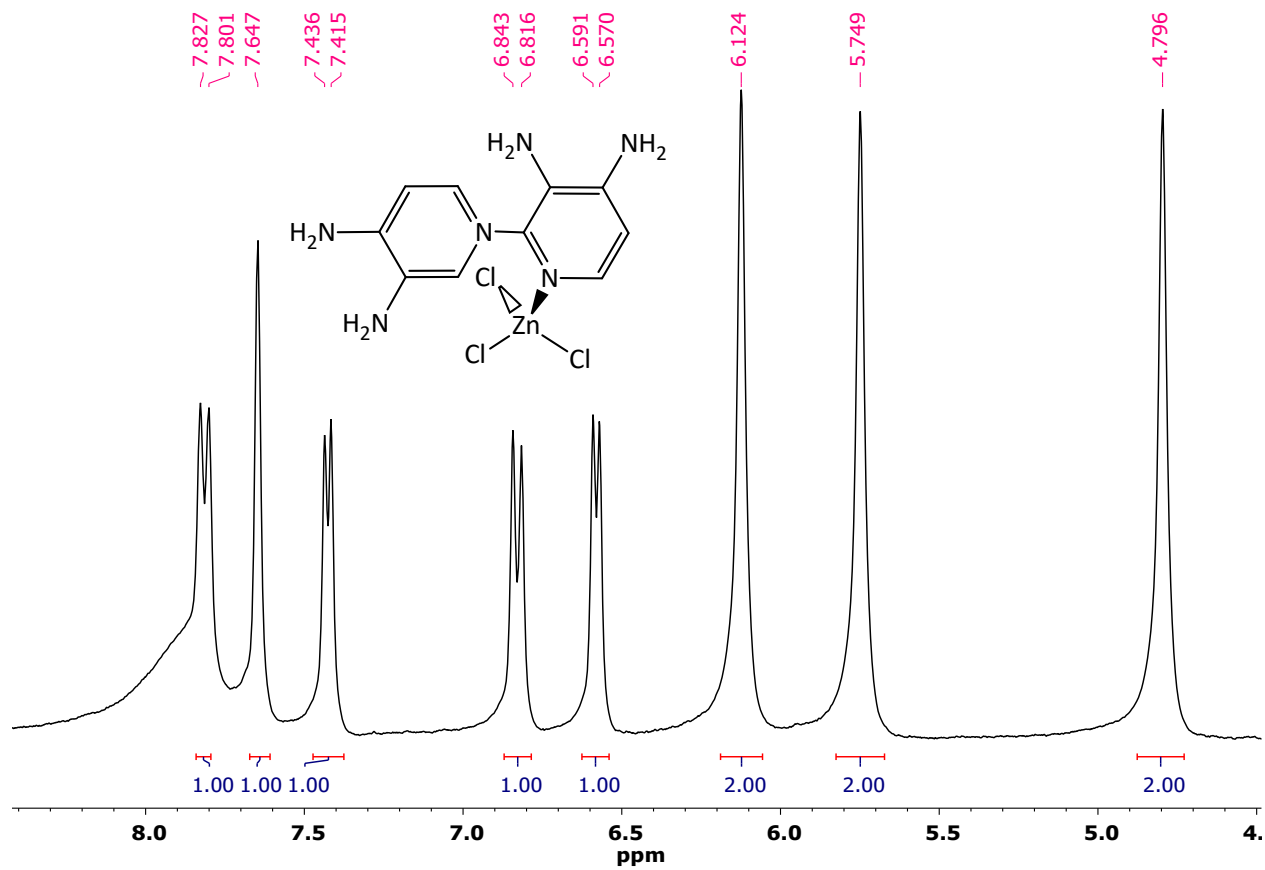

Figure S11. <sup>1</sup>H NMR spectrum of [Zn(AmpDimer)Cl<sub>3</sub>] (6) in DMSO-*d*<sub>6</sub>.

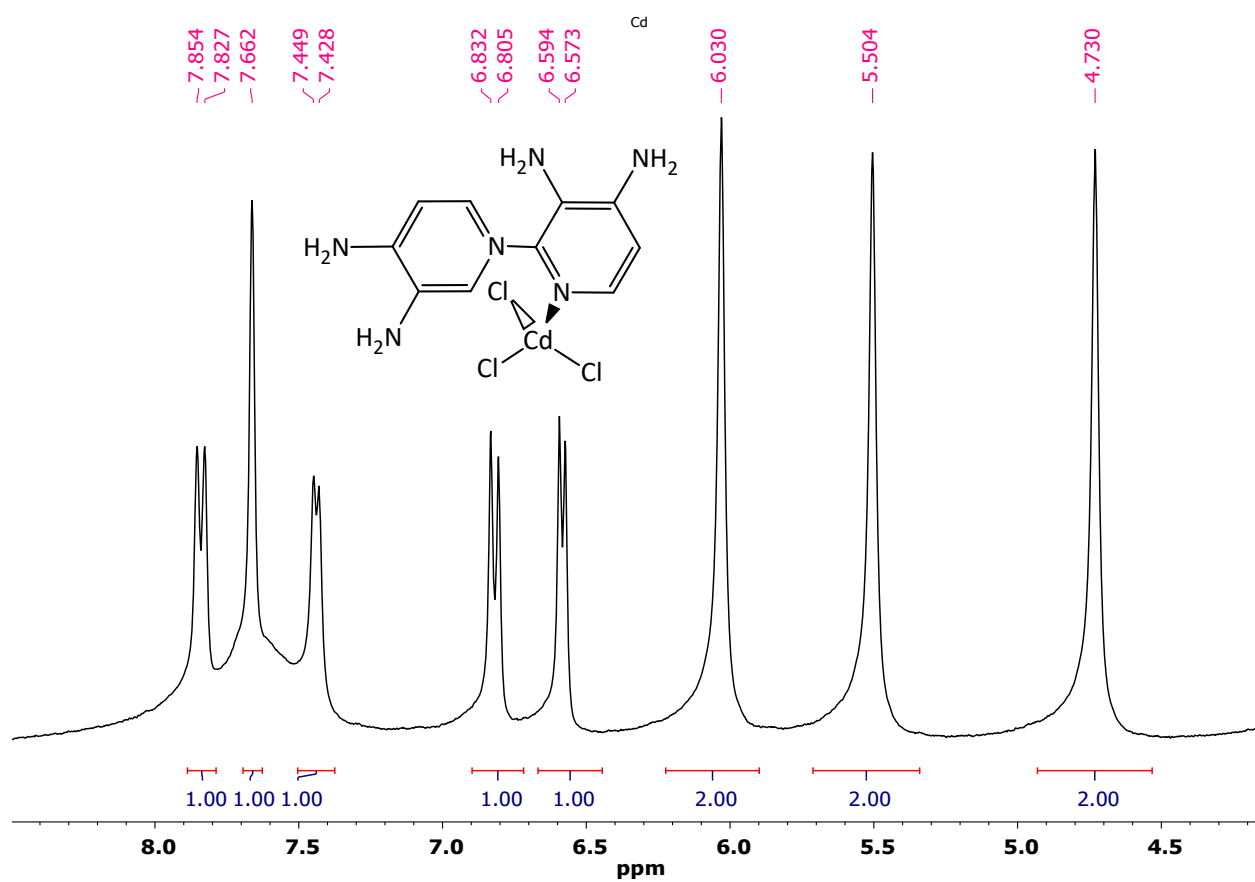

**Figure S12.** <sup>1</sup>H NMR spectrum of [Cd(AmpDimer)Cl<sub>3</sub>] (7) in DMSO-*d*<sub>6</sub>.

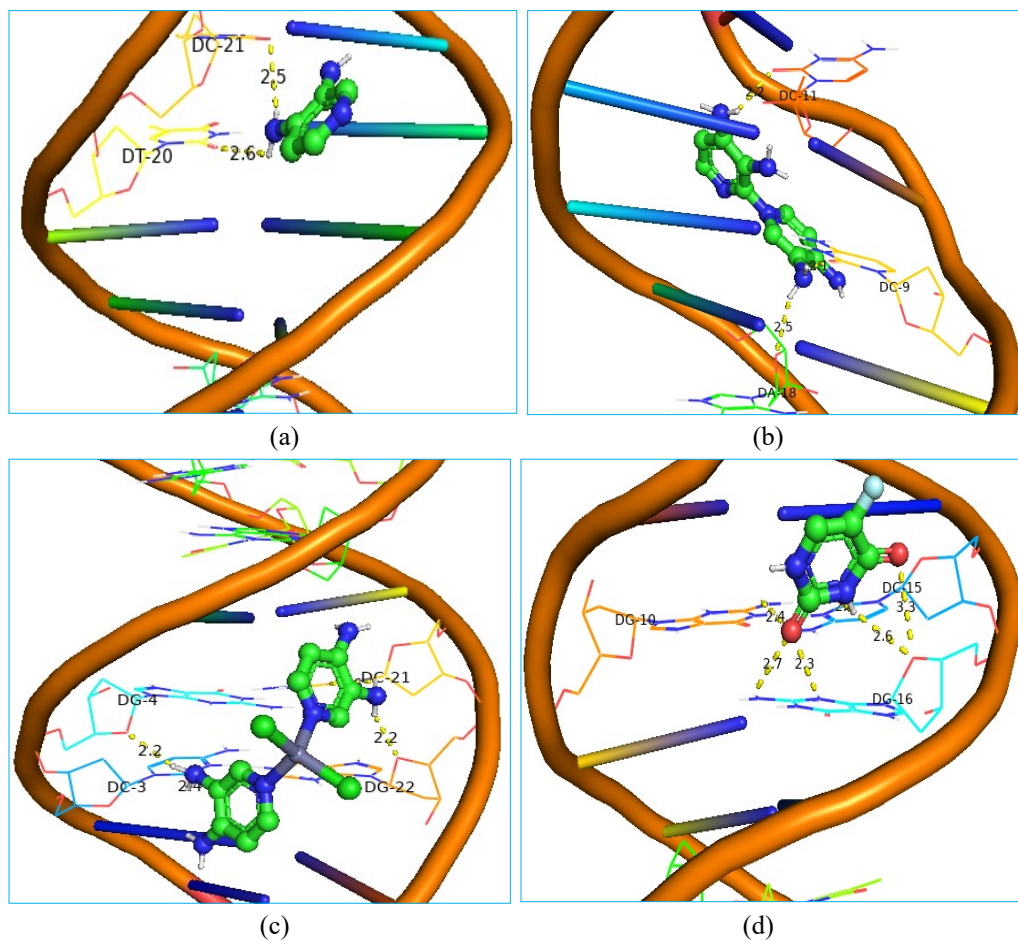

**Figure S13.** Molecular docking 3D visualization of AMP (a), [AmpDimer]<sup>+</sup> cation (b), [Zn(AMP)<sub>2</sub>Cl<sub>2</sub>] (c) and 5-FU (d) in the interaction with DNA (PDB ID: 1BNA), which shows the bond lengths between atoms of above compounds and 1BNA nucleotides.



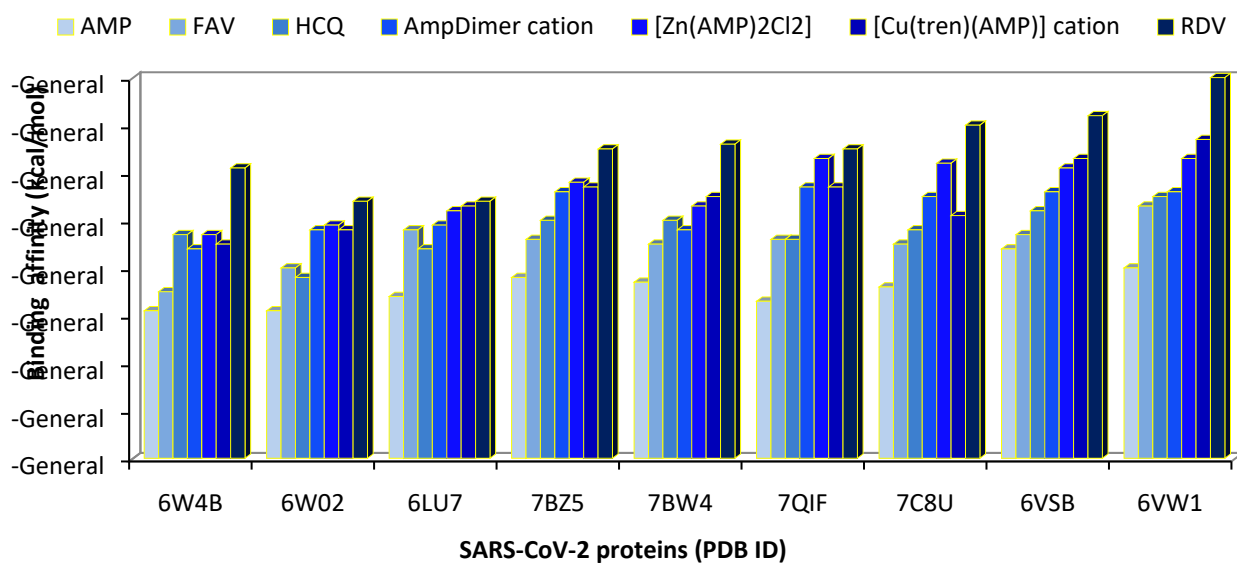

**Figure S14.** Comparison of binding affinity (kcal/mol) of AMP, [AmpDimer]<sup>+</sup> cation, [Zn(AMP)<sub>2</sub>Cl<sub>2</sub>], [Cu(tren)(AMP)]<sup>2+</sup> cation, FAV, HCQ and RDV in the interaction with essential proteins of SARS-CoV-2.

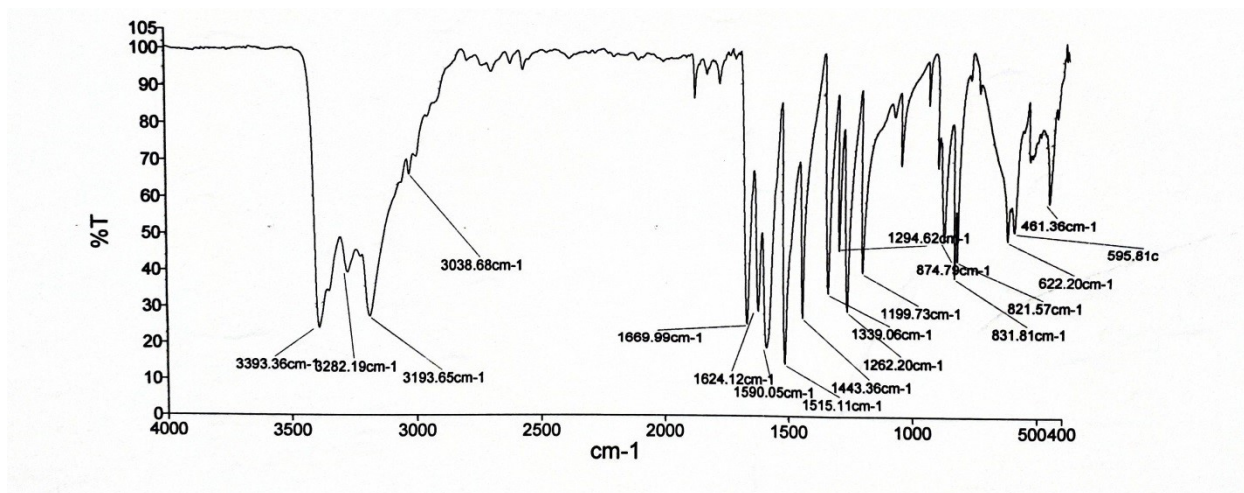

Figure S15. FT-IR (KBr disc) spectrum of AMP.

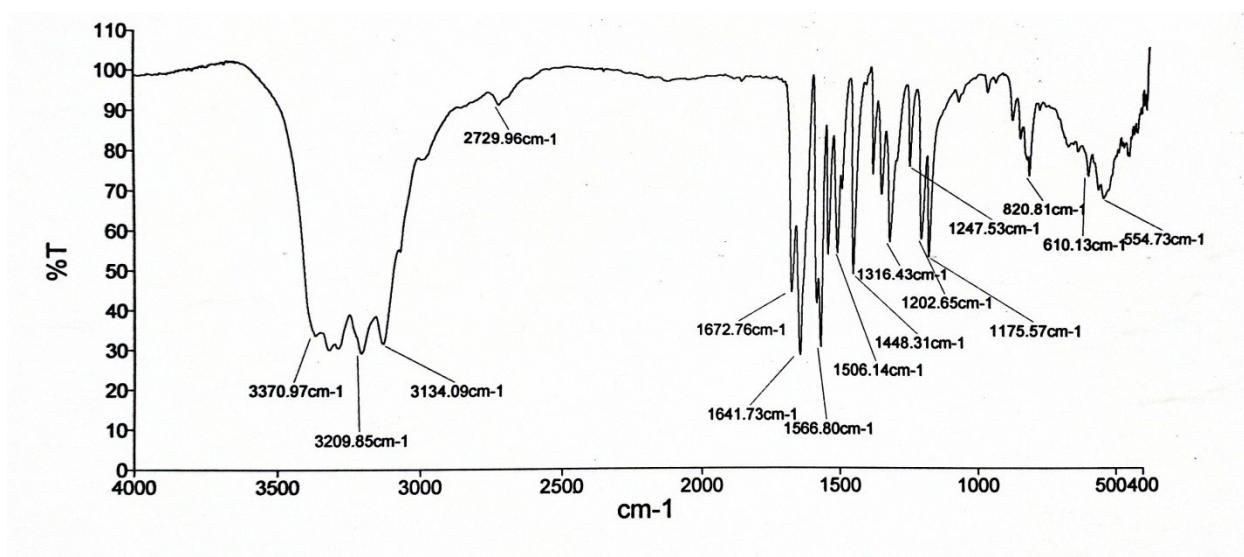

Figure S16. FT-IR (KBr disc) spectrum of [AmpDimer]Cl (3).

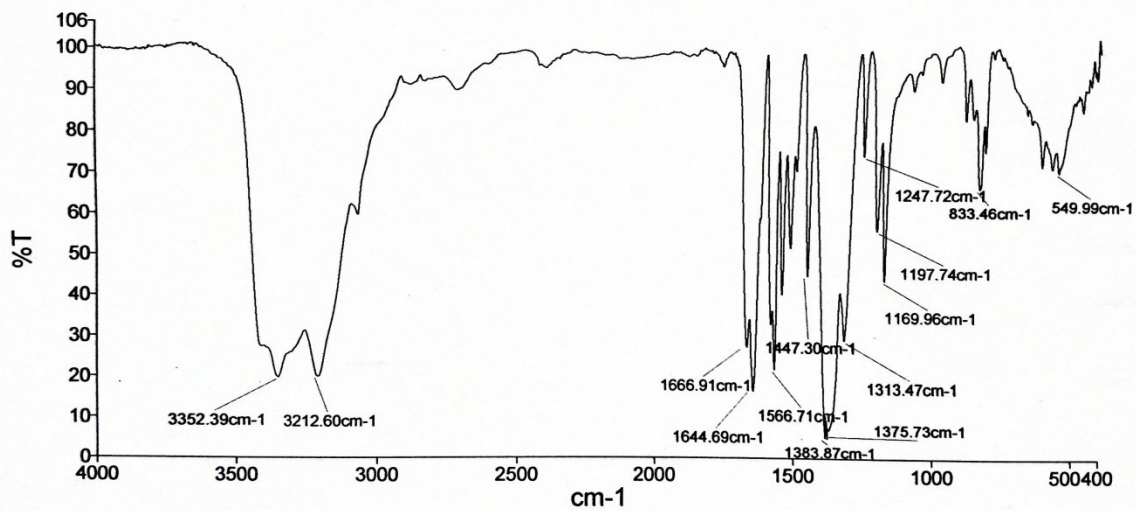

Figure S17. FT-IR (KBr disc) spectrum of [AmpDimer]NO<sub>3</sub> (4).

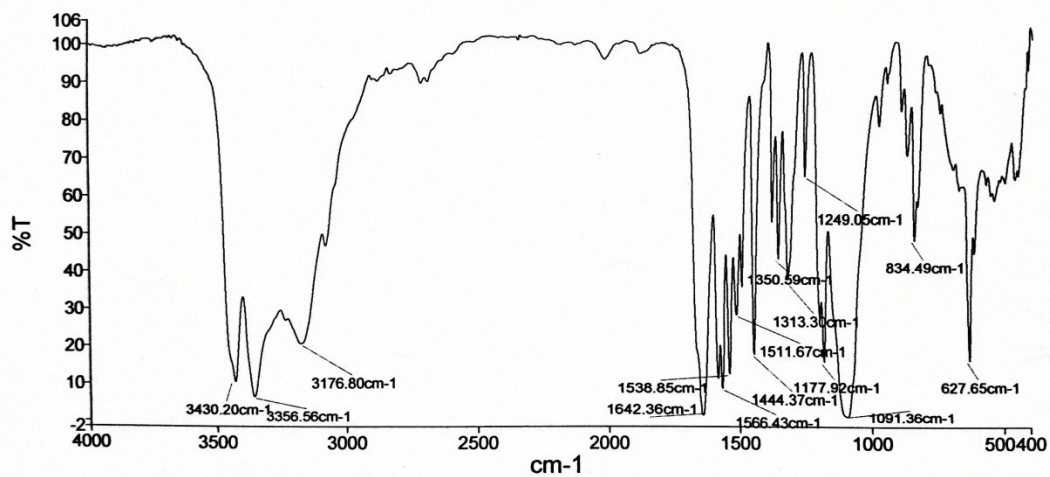

Figure S18. FT-IR (KBr disc) spectrum of [AmpDimer]ClO<sub>4</sub> (5).

**Table S1.** Hydrogen Bonds for [Zn(AMP)<sub>2</sub>Cl<sub>2</sub>] (1)

| <b>D-H...A</b>              | <b>d(D-H)/Å</b> | <b>d(H-A)/Å</b> | <b>d(D-A)/Å</b> | <b>D-H-A/°</b> |
|-----------------------------|-----------------|-----------------|-----------------|----------------|
| N2-H2A...Cl2 <sup>i</sup>   | 0.96(3)         | 2.43(3)         | 3.368(2)        | 166(2)         |
| N2-H2B...Cl2 <sup>ii</sup>  | 0.87(3)         | 2.55(3)         | 3.403(3)        | 166(3)         |
| N3-H3A...N5 <sup>iii</sup>  | 0.87(3)         | 2.31(3)         | 3.170(3)        | 169(3)         |
| N5-H5A...Cl1 <sup>iv</sup>  | 0.85(3)         | 2.54(3)         | 3.388(2)        | 171(3)         |
| N5-H5B...Cl1 <sup>v</sup>   | 0.82(3)         | 2.71(3)         | 3.527(2)        | 171(3)         |
| N6-H6A...Cl1 <sup>vi</sup>  | 0.84(4)         | 2.91(3)         | 3.459(2)        | 125(3)         |
| N6-H6B...Cl2 <sup>vii</sup> | 0.78(3)         | 2.95(3)         | 3.484(3)        | 128(3)         |
| C1-H1...Cl1                 | 0.95            | 2.84            | 3.463(3)        | 123.9          |
| C6-H6...Cl2                 | 0.95            | 2.89            | 3.482(3)        | 121.5          |
| C10-H10...N5 <sup>ii</sup>  | 0.95            | 2.55            | 3.481(3)        | 165.6          |

Symm. Code: i: -x,2-y,1-z; ii: -1+x,+y,+z; iii: 1-x,1-y,1-z; iv: 1-x,1-y,2-z; v: 1+x,+y,+z; vi: 1+x,-1+y,+z; vii: +x,-1+y,+z.

**Table S2.** Hydrogen Bonds for [AmpDimer]Cl (3)

| <b>D-H...A</b>              | <b>d(D-H)/Å</b> | <b>d(H-A)/Å</b> | <b>d(D-A)/Å</b> | <b>D-H-A/°</b> |
|-----------------------------|-----------------|-----------------|-----------------|----------------|
| N2-H2A...Cl1 <sup>i</sup>   | 0.88(2)         | 2.44(2)         | 3.3074(12)      | 168.4(16)      |
| N2-H2B...Cl1                | 0.86(2)         | 2.42(2)         | 3.2615(12)      | 168.7(17)      |
| N3-H3A...Cl1 <sup>ii</sup>  | 0.90(2)         | 2.72(2)         | 3.5103(13)      | 146.7(16)      |
| N3-H3B...Cl1 <sup>i</sup>   | 0.93(2)         | 2.44(2)         | 3.3475(12)      | 164.8(16)      |
| N5-H5A...Cl1 <sup>iii</sup> | 0.88(2)         | 2.49(2)         | 3.3462(13)      | 165.2(17)      |
| N5-H5B...N4 <sup>ii</sup>   | 0.88(2)         | 2.30(2)         | 3.1007(16)      | 151.2(19)      |
| N6-H6A...Cl1 <sup>iv</sup>  | 0.92(2)         | 2.64(2)         | 3.5331(12)      | 166.0(16)      |
| C5-H5...N2 <sup>ii</sup>    | 0.947(18)       | 2.514(18)       | 3.4259(17)      | 161.6(14)      |

Symm Code: i: -x,1/2+y,3/2-z; ii: +x,3/2-y,-1/2+z; iii: +x,+y,-1+z; iv: +x,1/2-y,-1/2+z

**Table S3.** Hydrogen Bonds for [AmpDimer]NO<sub>3</sub> (4)

| D-H...A                     | d(D-H)/Å   | d(H-A)/Å | d(D-A)/Å  | D-H-A/° |
|-----------------------------|------------|----------|-----------|---------|
| N2-H2A...O3 <sup>i</sup>    | 0.90(5)    | 2.17(6)  | 3.034(12) | 162(4)  |
| N2-H2A...N7 <sup>i</sup>    | 0.90(5)    | 2.59(5)  | 3.424(10) | 154(4)  |
| N2-H2A...O3A <sup>i</sup>   | 0.90(5)    | 2.07(8)  | 2.95(6)   | 165(5)  |
| N2-H2B...O2                 | 0.90(5)    | 2.06(5)  | 2.920(11) | 158(4)  |
| N2-H2B...O1A                | 0.90(5)    | 2.40(5)  | 3.22(2)   | 152(4)  |
| N2-H2B...O2A                | 0.90(5)    | 2.01(7)  | 2.82(5)   | 149(4)  |
| N2-H2B...N7A                | 0.90(5)    | 2.55(6)  | 3.45(4)   | 175(5)  |
| N5-H5A...N4 <sup>ii</sup>   | 0.90(5)    | 2.41(5)  | 3.184(6)  | 144(4)  |
| N5-H5B...O3 <sup>iii</sup>  | 0.80(5)    | 2.30(5)  | 3.017(11) | 149(5)  |
| N5-H5B...O3A <sup>iii</sup> | 0.80(5)    | 2.36(8)  | 3.12(5)   | 158(5)  |
| N6-H6A...O1 <sup>iii</sup>  | 0.74(6)    | 2.36(6)  | 3.102(6)  | 177(6)  |
| N6-H6A...O1A <sup>iii</sup> | 0.74(6)    | 2.33(6)  | 3.04(2)   | 161(6)  |
| N6-H6B...O2 <sup>iv</sup>   | 0.92(6)    | 2.29(6)  | 3.179(10) | 162(4)  |
| N6-H6B...O2A <sup>iv</sup>  | 0.92(6)    | 2.19(7)  | 3.07(5)   | 161(5)  |
| N3-H3A...O1                 | 0.90(7)    | 2.13(7)  | 2.954(7)  | 152(5)  |
| N3-H3B...O2 <sup>ii</sup>   | 0.89(7)    | 2.36(6)  | 3.011(13) | 130(5)  |
| N3A-H3AA...O3A <sup>i</sup> | 0.8907(11) | 2.40(4)  | 3.19(4)   | 148(2)  |

Symm Code: i: 1-x,1/2+y,3/2-z; ii: +x,1/2-y,-1/2+z; iii: 1-x,1/2+y,1/2-z; iv: 1-x,1-y,1-z

**Table S4.** Hydrogen Bonds for for [AmpDimer]ClO<sub>4</sub> (5)

| D-H...A                    | d(D-H)/Å | d(H-A)/Å  | d(D-A)/Å | D-H-A/° |
|----------------------------|----------|-----------|----------|---------|
| N2-H2A...O1 <sup>i</sup>   | 0.869(5) | 2.183(13) | 3.011(4) | 159(3)  |
| N2-H2B...O4                | 0.869(5) | 2.27(3)   | 2.947(3) | 135(3)  |
| N3-H3A...O2                | 0.91(4)  | 2.42(4)   | 3.178(4) | 142(3)  |
| N3-H3B...O2 <sup>ii</sup>  | 0.91(4)  | 2.46(4)   | 3.316(4) | 158(3)  |
| N5-H5A...N4 <sup>iii</sup> | 0.85(3)  | 2.26(4)   | 3.103(3) | 169(3)  |
| N6-H6A...O4 <sup>iv</sup>  | 0.83(4)  | 2.39(4)   | 3.171(3) | 157(3)  |
| N6-H6B...O3 <sup>v</sup>   | 0.80(4)  | 2.45(4)   | 3.219(3) | 161(3)  |
| C1-H1...N5 <sup>vi</sup>   | 0.95     | 2.61      | 3.380(4) | 138.6   |

Symm Code: i: 1-x,1/2+y,3/2-z; ii: 1-x,-y,1-z; iii: +x,1/2-y,-1/2+z; iv: 1-x,1-y,1-z; v: 1-x,1/2+y,1/2-z; vi: -x,1-y,-z

**Table S5.** Hydrogen Bonds for [Cd(AmpDimer)Cl<sub>3</sub>] (7)

| D-H...A                     | d(D-H)/Å | d(H-A)/Å | d(D-A)/Å  | D-H-A/° |
|-----------------------------|----------|----------|-----------|---------|
| N2-H2A...C12 <sup>i</sup>   | 0.88     | 2.63     | 3.458(4)  | 156.9   |
| N2-H2B...C13 <sup>ii</sup>  | 0.88     | 2.64     | 3.444(5)  | 152.8   |
| N3-H3A...C11 <sup>iii</sup> | 0.88     | 2.75     | 3.481(5)  | 141.0   |
| N3-H3B...C13 <sup>ii</sup>  | 0.88     | 2.58     | 3.416(5)  | 159.8   |
| N6-H6A...C11 <sup>iv</sup>  | 0.88     | 2.57     | 3.197(6)  | 129.2   |
| N6-H6B...C13 <sup>iv</sup>  | 0.88     | 2.47     | 3.336(7)  | 169.2   |
| N5-H5A...C11 <sup>v</sup>   | 0.88     | 2.54     | 3.204(8)  | 133.0   |
| N5-H5B...C13 <sup>iv</sup>  | 0.88     | 2.54     | 3.400(7)  | 167.0   |
| N5A-H5AA...N2 <sup>vi</sup> | 0.88     | 2.29     | 3.047(13) | 144.4   |
| N5A-H5AA...N3 <sup>vi</sup> | 0.88     | 2.62     | 3.094(12) | 114.6   |
| N5A-H5AB...N6               | 0.88     | 1.99     | 2.462(14) | 111.8   |

Symm Code: i: 1-x,1-y,-z; ii: 1+x,-1+y,+z; iii: 1+x,+y,+z; iv: 1-x,2-y,1-z; v: 1-x,1-y,1-z; vi: +x,1+y,+z

**Table S6.** Selected Torsion Angles (°) for [Cu(tren)(AMP)](ClO<sub>4</sub>)<sub>2</sub> (8) and [Cd(tren)(AMP)](ClO<sub>4</sub>)<sub>2</sub> (10)

| (8, cation 1)         |           | (8, cation 2)   |           | (10, cation 1) |           |
|-----------------------|-----------|-----------------|-----------|----------------|-----------|
| <b>Torsion Angles</b> |           |                 |           |                |           |
| N1-C1-C2-N2           | -53.7(4)  | N8-C12-C13-N9   | -50.8(4)  | N1-C1-C2-N2    | -57.5(4)  |
| N1-C3-C4-N3           | -51.9(3)  | N8-C14-C15-N10  | -51.4(4)  | N1-C3-C4-N3    | -56.1(3)  |
| N1-C5-C6-N4           | -50.0(3)  | N8-C16-C17-N11  | -49.5(4)  | N1-C5-C6-N4    | -57.2(3)  |
| N2-Cu1-N5-C7          | 21.2(3)   | N9-Cu2-N12-C18  | 85.4(3)   | N2-Cd1-N5-C7   | 22.9(3)   |
| N2-Cu1-N5-C11         | -167.7(2) | N9-Cu2-N12-C22  | -87.6(2)  | N2-Cd1-N5-C11  | -164.5(2) |
| N3-Cu1-N5-C7          | 142.7(3)  | N10-Cu2-N12-C18 | -157.2(3) | N3-Cd1-N5-C7   | 146.0(2)  |
| N3-Cu1-N5-C11         | -46.2(3)  | N10-Cu2-N12-C22 | 29.9(3)   | N3-Cd1-N5-C11  | -41.4(2)  |
| N4-Cu1-N5-C7          | -94.5(3)  | N11-Cu2-N12-C18 | -48.5(3)  | N4-Cd1-N5-C7   | -99.5(3)  |
| N4-Cu1-N5-C11         | 76.6(2)   | N11-Cu2-N12-C22 | 138.5(2)  | N4-Cd1-N5-C11  | 73.1(2)   |

**Table S7.** Hydrogen Bonds for [Cu(tren)(AMP)](ClO<sub>4</sub>)<sub>2</sub> (**8**)

| D-H...A                        | d(D-H)/Å | d(H-A)/Å | d(D-A)/Å  | D-H-A/° |
|--------------------------------|----------|----------|-----------|---------|
| N2-H2A...O8 <sup>i</sup>       | 0.91     | 2.47     | 3.241(4)  | 142.1   |
| N2-H2A...O3A <sup>ii</sup>     | 0.91     | 2.55     | 3.074(9)  | 116.8   |
| N2-H2B...O11 <sup>iii</sup>    | 0.91     | 2.21     | 3.105(9)  | 166.7   |
| N2-H2B...O9A <sup>iii</sup>    | 0.91     | 2.49     | 3.279(4)  | 145.9   |
| N2-H2B...O11A <sup>iii</sup>   | 0.91     | 2.53     | 3.395(4)  | 158.3   |
| N3-H3A...N6 <sup>ii</sup>      | 0.91     | 2.32     | 3.222(4)  | 171.9   |
| N3-H3B...O10 <sup>iv</sup>     | 0.91     | 2.39     | 2.966(11) | 121.3   |
| N3-H3B...O10A <sup>iv</sup>    | 0.91     | 2.42     | 3.061(3)  | 127.6   |
| N3-H3B...O13                   | 0.91     | 2.48     | 3.267(6)  | 145.2   |
| N3-H3B...O13A                  | 0.91     | 2.40     | 2.989(6)  | 122.7   |
| N4-H4A...O16                   | 0.91     | 2.12     | 2.929(5)  | 147.6   |
| N4-H4A...O16A                  | 0.91     | 2.25     | 3.147(6)  | 170.0   |
| N4-H4B...O6 <sup>i</sup>       | 0.91     | 2.31     | 3.119(4)  | 147.3   |
| N6-H6A...O11A <sup>v</sup>     | 0.88     | 2.39     | 3.122(4)  | 141.2   |
| N6-H6B...O9 <sup>vi</sup>      | 0.88     | 2.54     | 3.389(15) | 162.7   |
| N6-H6B...O10A <sup>vi</sup>    | 0.88     | 2.21     | 3.079(4)  | 168.7   |
| N7-H7A...O15A                  | 0.89     | 2.40     | 3.062(6)  | 131.8   |
| N7-H7B...O11A <sup>v</sup>     | 0.88     | 2.33     | 3.091(4)  | 144.0   |
| C3-H3D...O14A <sup>iv</sup>    | 0.99     | 2.52     | 3.408(6)  | 149.1   |
| C4-H4C...O13A                  | 0.99     | 2.44     | 3.120(5)  | 125.4   |
| C6-H6D...O15 <sup>v</sup>      | 0.99     | 2.58     | 3.543(6)  | 163.9   |
| C6-H6D...O16A <sup>v</sup>     | 0.99     | 2.59     | 3.486(7)  | 149.9   |
| C8-H8...O9 <sup>vi</sup>       | 0.95     | 2.53     | 3.360(13) | 146.7   |
| C8-H8...O9A <sup>vi</sup>      | 0.95     | 2.45     | 3.326(4)  | 153.7   |
| C11-H11...O13                  | 0.95     | 2.60     | 3.543(6)  | 173.3   |
| N9-H9A...O1 <sup>vii</sup>     | 0.91     | 2.34     | 3.176(5)  | 152.5   |
| N9-H9A...O3A <sup>vii</sup>    | 0.91     | 2.46     | 3.156(10) | 133.9   |
| N9-H9B...O4 <sup>viii</sup>    | 0.91     | 2.31     | 3.209(5)  | 171.7   |
| N9-H9B...O4A <sup>viii</sup>   | 0.91     | 2.49     | 3.389(13) | 168.0   |
| N10-H10A...O2A <sup>viii</sup> | 0.91     | 2.05     | 2.837(11) | 144.3   |
| N10-H10B...O8 <sup>i</sup>     | 0.91     | 2.43     | 3.238(4)  | 148.6   |
| N11-H11A...O4 <sup>ii</sup>    | 0.91     | 2.28     | 3.098(5)  | 150.0   |
| N11-H11A...O4A <sup>ii</sup>   | 0.91     | 2.20     | 3.070(8)  | 160.2   |
| N11-H11B...O7 <sup>ix</sup>    | 0.91     | 2.33     | 3.191(4)  | 156.8   |
| N13-H13A...O15 <sup>v</sup>    | 0.89     | 2.46     | 3.237(6)  | 147.4   |
| N13-H13B...O13 <sup>iv</sup>   | 0.88     | 2.31     | 3.186(6)  | 169.0   |
| N14-H14A...O7 <sup>i</sup>     | 0.89     | 2.32     | 3.144(4)  | 153.9   |
| N14-H14B...O14 <sup>v</sup>    | 0.88     | 2.44     | 3.055(6)  | 127.0   |
| N14-H14B...O15 <sup>v</sup>    | 0.88     | 2.54     | 3.407(7)  | 166.6   |
| N14-H1...O15A <sup>v</sup>     | 0.88     | 2.20     | 2.951(6)  | 142.3   |
| C12-H12A...O3A <sup>vii</sup>  | 0.99     | 2.52     | 3.269(13) | 132.4   |
| C13-H13C...O9A <sup>i</sup>    | 0.99     | 2.49     | 3.414(4)  | 154.9   |
| C14-H14C...O12 <sup>i</sup>    | 0.99     | 2.41     | 3.179(16) | 134.4   |
| C15-H15A...O1A <sup>ii</sup>   | 0.99     | 2.59     | 3.494(16) | 151.7   |
| C17-H17A...O2A <sup>vii</sup>  | 0.99     | 2.49     | 3.462(12) | 167.0   |
| C18-H18...O2 <sup>vii</sup>    | 0.95     | 2.48     | 3.353(6)  | 152.0   |
| C18-H18...O1A <sup>vii</sup>   | 0.95     | 2.33     | 3.133(9)  | 141.3   |
| C22-H22...O2 <sup>viii</sup>   | 0.95     | 2.54     | 3.348(6)  | 142.5   |

Symm Code: i: 1/2+x,3/2-y,-1/2+z; ii: -1+x,+y,+z; iii: +x,+y,-1+z; iv: -x,l-y,l-z; v: l-x,l-y,l-z; vi: 1+x,+y,-1+z; vii: -3/2+x,3/2-y,1/2+z; viii: -1/2+x,3/2-y,1/2+z; ix: -1/2+x,3/2-y,-1/2+z

**Table S8.** Selected Bond Lengths (Å), Angles and Torsion Angles (°) for [Cd(tren)(AMP)](ClO<sub>4</sub>)<sub>2</sub> (**10**)

|                       |            | Component:     | <b>1</b> | <b>2(A)</b> | <b>3(B)</b> |
|-----------------------|------------|----------------|----------|-------------|-------------|
|                       |            | Occupancy:     | 0.368(2) | 0.345(2)    | 0.2871(11)  |
| <b>Bond Lengths</b>   |            |                |          |             |             |
| Cd1-N1                | 2.384(2)   | Cd2-N8         | 2.409(5) | 2.395(6)    | 2.427(6)    |
| Cd1-N2                | 2.278(3)   | Cd2-N9         | 2.244(7) | 2.286(7)    | 2.328(7)    |
| Cd1-N3                | 2.312(3)   | Cd2-N10        | 2.295(7) | 2.261(7)    | 2.231(8)    |
| Cd1-N4                | 2.279(3)   | Cd2-N11        | 2.312(6) | 2.297(6)    | 2.305(7)    |
| Cd1-N5                | 2.246(2)   | Cd2-N12        | 2.238(5) | 2.248(5)    | 2.242(6)    |
| <b>Angles</b>         |            |                |          |             |             |
| N2-Cd1-N1             | 77.31(9)   | N9-Cd2-N8      | 76.9(3)  | 76.1(3)     | 73.4(3)     |
| N2-Cd1-N3             | 117.20(10) | N9-Cd2-N10     | 108.4(4) | 106.8(4)    | 104.7(4)    |
| N2-Cd1-N4             | 116.22(10) | N9-Cd2-N11     | 119.1(5) | 118.8(5)    | 117.1(5)    |
| N3-Cd1-N1             | 76.76(9)   | N10-Cd2-N8     | 76.0(3)  | 78.2(3)     | 77.8(3)     |
| N4-Cd1-N1             | 77.89(9)   | N11-Cd2-N8     | 75.8(3)  | 76.5(3)     | 75.2(3)     |
| N4-Cd1-N3             | 112.52(10) | N10-Cd2-N11    | 116.0(5) | 119.4(5)    | 119.8(5)    |
| N5-Cd1-N1             | 172.19(9)  | N12-Cd2-N8     | 166.8(4) | 169.6(4)    | 158.4(4)    |
| N5-Cd1-N2             | 110.44(10) | N12-Cd2-N9     | 115.0(3) | 107.3(3)    | 97.3(3)     |
| N5-Cd1-N3             | 98.20(9)   | N12-Cd2-N10    | 104.1(4) | 109.4(3)    | 123.7(4)    |
| N5-Cd1-N4             | 98.90(9)   | N12-Cd2-N11    | 92.6(4)  | 93.4(4)     | 92.8(4)     |
| <b>Torsion Angles</b> |            |                |          |             |             |
| N1-C1-C2-N2           | -57.5(4)   | N8-C12-C13-N9  | 52.9(14) | 49.2(16)    | -57.1(12)   |
| N1-C3-C4-N3           | -56.1(3)   | N8-C14-C15-N10 | 55.8(15) | 40(2)       | -61(2)      |
| N1-C5-C6-N4           | -57.2(3)   | N8-C16-C17-N11 | 53(2)    | 48(2)       | -52(3)      |
| N2-Cd1-N5-C7          | 22.9(3)    | N9-Cd2-N12-C18 | 155(2)   | 160(3)      | 134(2)      |



---

|               |           |                 |            |            |            |
|---------------|-----------|-----------------|------------|------------|------------|
| N2-Cd1-N5-C11 | -164.5(2) | N9-Cd2-N12-C22  | -24.8(17)  | -33.6      | -39.9(16)  |
| N3-Cd1-N5-C7  | 146.0(2)  | N10-Cd2-N12-C18 | 37(3)      | 44(3)      | 21(2)      |
| N3-Cd1-N5-C11 | -41.4(2)  | N10-Cd2-N12-C22 | -143.3(15) | -149.1(15) | -153.0(15) |
| N4-Cd1-N5-C7  | -99.5(3)  | N11-Cd2-N12-C18 | -81(3)     | -78(3)     | -108(2)    |
| N4-Cd1-N5-C11 | 73.1(2)   | N11-Cd2-N12-C22 | 99.1(16)   | 88.1(16)   | 77.9(17)   |

---

**Table S9.** Hydrogen Bonds for [Cd(tren)(AMP)](ClO<sub>4</sub>)<sub>2</sub> (**10**)

| D-H...A                          | d(D-H)/Å | d(H-A)/Å  | d(D-A)/Å  | D-H-A/° |
|----------------------------------|----------|-----------|-----------|---------|
| N2-H2A...O9A <sup>i</sup>        | 0.91     | 2.56      | 3.085(8)  | 117.4   |
| N2-H2A...O15 <sup>ii</sup>       | 0.91     | 2.38      | 3.174(4)  | 146.1   |
| N2-H2A...O15A <sup>ii</sup>      | 0.91     | 2.19      | 3.089(19) | 172.2   |
| N2-H2B...O7 <sup>i</sup>         | 0.91     | 2.29      | 3.130(4)  | 153.1   |
| N3-H3A...N6 <sup>iii</sup>       | 0.91     | 2.33      | 3.232(4)  | 172.2   |
| N3-H3B...O1                      | 0.91     | 2.26      | 2.890(4)  | 126.4   |
| N3-H3B...O3A                     | 0.91     | 2.59      | 3.423(9)  | 153.0   |
| N4-H4A...O4                      | 0.91     | 2.37      | 3.207(5)  | 153.5   |
| N4-H4A...O1A                     | 0.91     | 2.03      | 2.856(10) | 150.5   |
| N4-H4A...O1B                     | 0.91     | 2.16      | 2.933(12) | 142.6   |
| N4-H4B...O2B <sup>iv</sup>       | 0.91     | 2.56      | 3.099(16) | 118.6   |
| N4-H4B...O16 <sup>ii</sup>       | 0.91     | 2.56      | 3.201(4)  | 127.9   |
| N4-H4B...O16A <sup>ii</sup>      | 0.91     | 2.37      | 3.04(2)   | 130.2   |
| N6-H6A...O5 <sup>v</sup>         | 0.878(5) | 2.229(8)  | 3.105(5)  | 176(4)  |
| N6-H6B...O6 <sup>vi</sup>        | 0.878(5) | 2.235(11) | 3.085(5)  | 163(3)  |
| N7-H7A...O3                      | 0.878(5) | 2.33(2)   | 3.009(5)  | 135(3)  |
| N7-H7B...O5 <sup>v</sup>         | 0.878(5) | 2.289(14) | 3.128(4)  | 160(3)  |
| C2-H2D...O14A <sup>iv</sup>      | 0.99     | 2.49      | 3.20(2)   | 128.4   |
| C4-H4C...O1                      | 0.99     | 2.54      | 3.152(4)  | 120.2   |
| C4-H4C...O1B                     | 0.99     | 2.58      | 3.315(11) | 131.1   |
| C4-H4D...O4A <sup>iii</sup>      | 0.99     | 2.59      | 3.368(8)  | 135.3   |
| C4-H4D...O4B <sup>iii</sup>      | 0.99     | 2.48      | 3.192(10) | 128.9   |
| C6-H6D...O4A <sup>iv</sup>       | 0.99     | 2.46      | 3.340(11) | 147.8   |
| C6-H6D...O4B <sup>iv</sup>       | 0.99     | 2.49      | 3.338(16) | 143.7   |
| C8-H8...O7 <sup>vi</sup>         | 0.95     | 2.38      | 3.260(4)  | 153.8   |
| C11-H11...O3A                    | 0.95     | 2.50      | 3.433(9)  | 166.4   |
| C11-H11...O3B                    | 0.95     | 2.49      | 3.365(12) | 153.3   |
| N9-H9A...O15 <sup>iii</sup>      | 0.91     | 2.53      | 3.263(12) | 138.0   |
| N9-H9B...O10                     | 0.91     | 2.57      | 3.303(14) | 138.5   |
| N10-H10A...O13                   | 0.91     | 2.59      | 3.459(9)  | 159.7   |
| N10-H10A...O14                   | 0.91     | 2.54      | 3.012(7)  | 112.6   |
| N10-H10B...O11 <sup>vii</sup>    | 0.91     | 2.31      | 3.150(11) | 152.7   |
| N11-H11A...O11                   | 0.91     | 2.38      | 3.201(18) | 150.1   |
| N11-H11B...O9 <sup>viii</sup>    | 0.91     | 2.22      | 3.096(19) | 161.0   |
| N13-H13B...O8 <sup>v</sup>       | 0.879(5) | 2.38(7)   | 2.886(10) | 116(5)  |
| N14-H14A...O3                    | 0.879(5) | 1.98(4)   | 2.474(9)  | 114(4)  |
| N9A-H9AA...O15A <sup>iii</sup>   | 0.91     | 2.51      | 3.33(2)   | 149.9   |
| N9A-H9AB...O10A                  | 0.91     | 2.30      | 3.000(15) | 133.2   |
| N10A-H10D...O11A <sup>vii</sup>  | 0.91     | 2.54      | 3.356(15) | 149.7   |
| N10A-H10D...O14A                 | 0.91     | 2.27      | 2.83(2)   | 119.4   |
| N11A-H11C...O11A                 | 0.91     | 2.44      | 3.31(2)   | 158.7   |
| N11A-H11D...O9A <sup>viii</sup>  | 0.91     | 2.45      | 3.26(2)   | 149.2   |
| N11A-H11D...O15A <sup>ix</sup>   | 0.91     | 2.51      | 3.22(2)   | 135.7   |
| C13A-H13H...O12A <sup>vii</sup>  | 0.99     | 2.47      | 3.293(17) | 140.6   |
| C14A-H14G...O8 <sup>viii</sup>   | 0.99     | 2.51      | 3.331(11) | 140.4   |
| C17A-H17C...O7                   | 0.99     | 2.57      | 3.38(2)   | 139.3   |
| C18A-H18A...O12A <sup>viii</sup> | 0.95     | 2.44      | 3.30(2)   | 151.0   |
| C22A-H22A...O13A <sup>iii</sup>  | 0.95     | 2.39      | 2.90(2)   | 112.9   |
| N14A-H14E...O12A                 | 0.880(5) | 2.60(4)   | 3.39(2)   | 150(6)  |
| N14A-H14F...O2A                  | 0.880(5) | 2.31(2)   | 3.16(2)   | 160(4)  |
| N9B-H9BA...O11B <sup>vii</sup>   | 0.91     | 1.81      | 2.716(14) | 170.7   |
| N10B-H10E...C13B <sup>viii</sup> | 0.91     | 2.65      | 3.463(13) | 148.9   |
| N10B-H10E...O10B <sup>viii</sup> | 0.91     | 2.13      | 3.005(15) | 162.4   |
| N11B-H11E...O10B                 | 0.91     | 2.49      | 3.27(2)   | 144.0   |
| C13B-H13K...O10B                 | 0.99     | 2.33      | 3.256(14) | 155.3   |
| C13B-H13L...O12B <sup>vii</sup>  | 0.99     | 2.59      | 3.285(16) | 126.8   |
| C14B-H14K...O8 <sup>viii</sup>   | 0.99     | 2.49      | 3.026(10) | 114.0   |
| C16B-H16F...O7                   | 0.99     | 2.59      | 3.189(9)  | 118.7   |
| C17B-H17F...O9B <sup>viii</sup>  | 0.99     | 2.57      | 3.40(4)   | 141.1   |
| C19B-H19B...O3B <sup>viii</sup>  | 0.95     | 2.49      | 3.37(2)   | 154.0   |

Symm Code: i:  $1/2-x, 1/2+y, 1/2-z$ ; ii:  $2-x, 1-y, 1-z$ ; iii:  $-1+x, +y, +z$ ; iv:  $1-x, 1-y, 1-z$ ; v:  $1/2+x, 1/2-y, -1/2+z$ ; vi:  $3/2-x, 1/2+y, 1/2-z$ ; vii:  $1/2+x, 1/2-y, 1/2+z$ ; viii:  $1+x, +y, +z$ ; ix:  $-1/2+x, 1/2-y, -1/2+z$
